# Supplementary material for: Lipid synthesis, triggered by PPARγ T166 dephosphorylation, sustains reparative function of macrophages during tissue repair
Source: PubMed Central journal article supplement — Nat Commun. 2024 Aug 23;15:7269. doi: 10.1038/s41467-024-51736-5 (PMC11343878; doi:10.1038/s41467-024-51736-5), 2024-08-23
Supplement: 41467_2024_51736_MOESM3_ESM.pdf [file 41467_2024_51736_MOESM3_ESM.pdf]

### **Description of Additional Supplementary Files**

**Supplementary Data 1:** List of oligonucleotide sequences used in this study.

**Supplementary Data 2:** Publicly available RNA-seq and scRNA-seq datasets used in this study.

**Supplementary Data 3:** Differentially expressed lipid metabolites in BMDMs with or without IL-10 treatment (n = 4 per group). Data were analysed by two-tailed Student's *t*-test.
